# Supplementary material
Source: PubMed Central journal article supplement (PMC4349503)

# Supplementary Figure 1.

A.

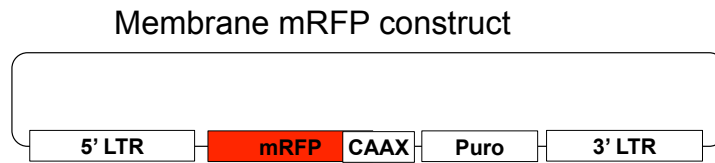

B. i Notch reporter CBFRE::GFP

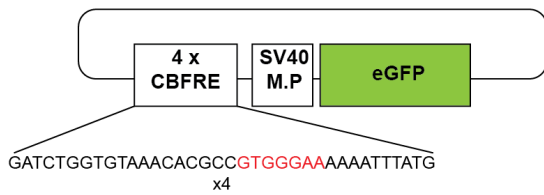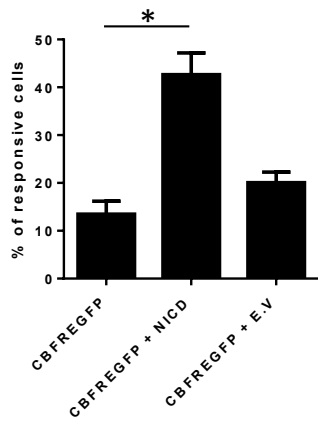

ii SRF reporter 3DA::2eGFP

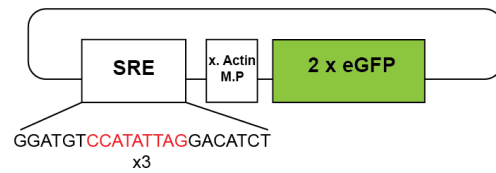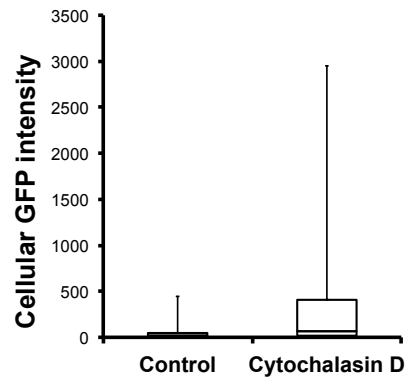

C. Notch reporter

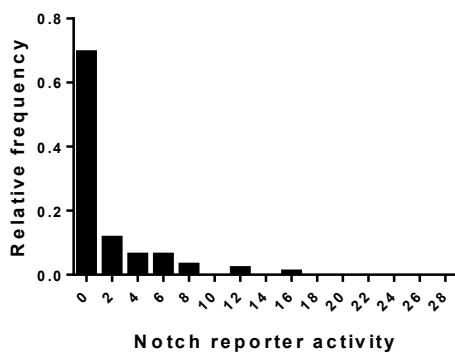

SRF reporter

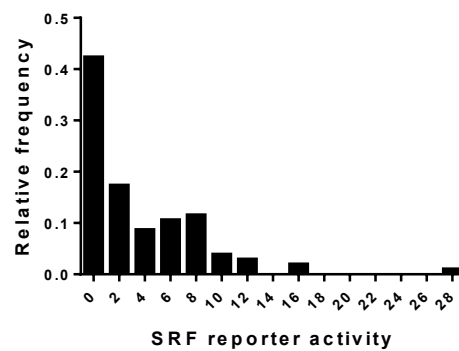

Supplement: NIHMS59788-supplement-Supp_Fig_1.pdf [file NIHMS59788-supplement-Supp_Fig_1.pdf]
