# Supplementary material
Source: PubMed Central journal article supplement (PMC4349503)

# Supplementary Figure 2.

A. i SRF reporter – 3DA::2eGFP Fos 3'UTR) iii

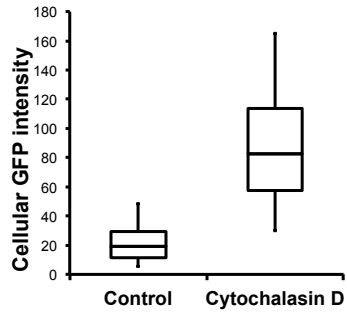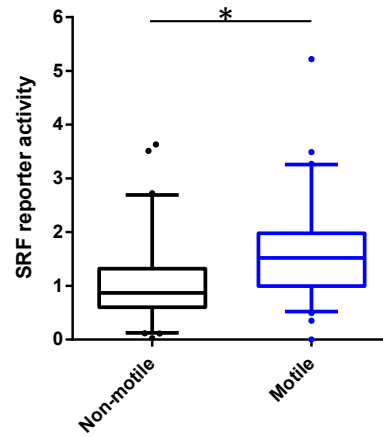

ii

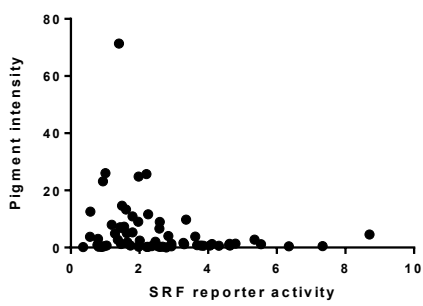

B.

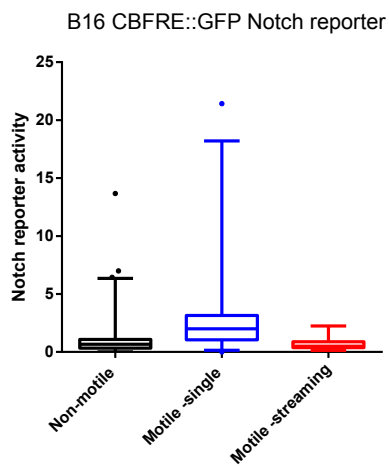

B16 3DA::2eGFP SRF reporter

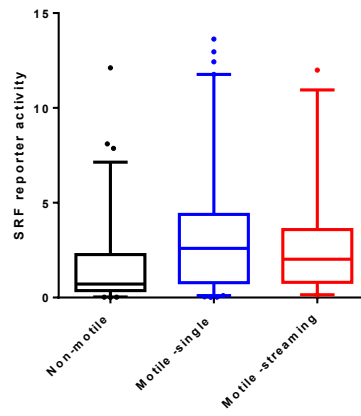

C.

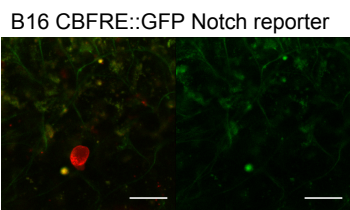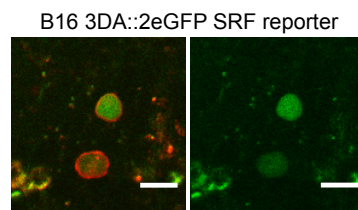

Supplement: NIHMS59788-supplement-Supp_Fig_2.pdf [file NIHMS59788-supplement-Supp_Fig_2.pdf]

# Supplementary Figure 4.

A. i

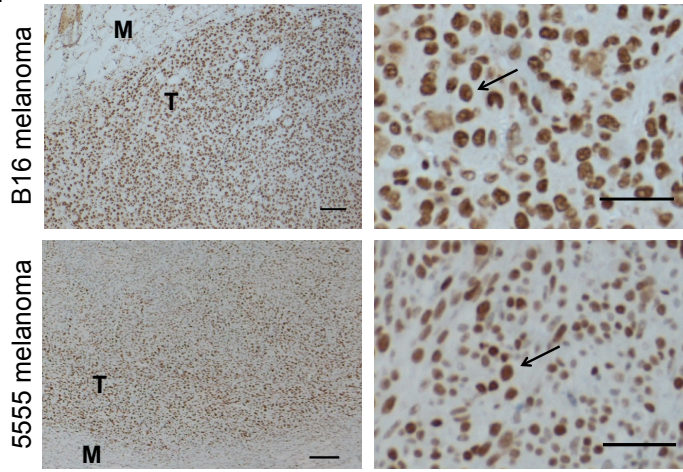

ii

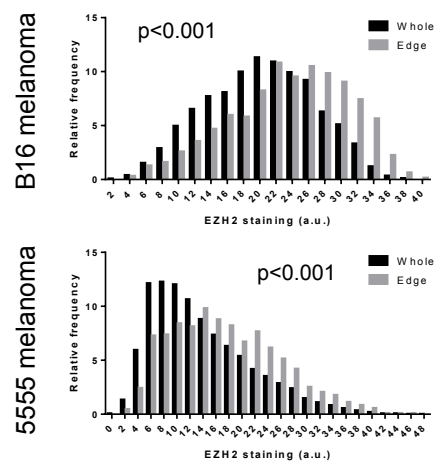

B.

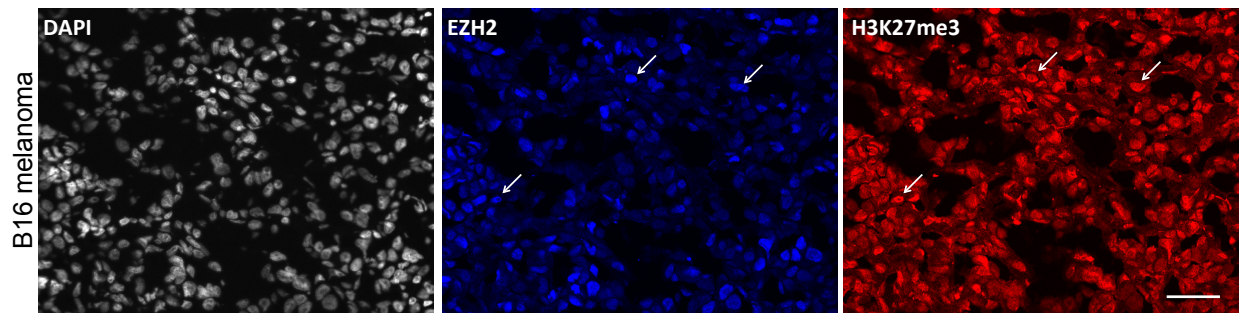

C.

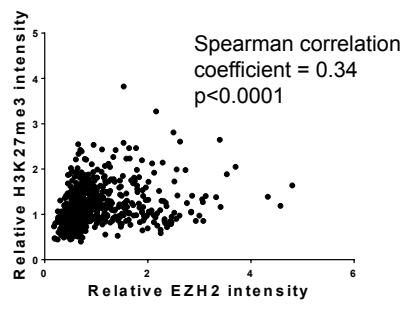

D.

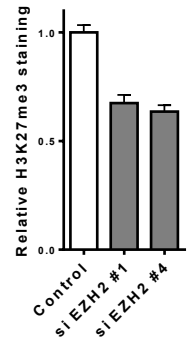

E.

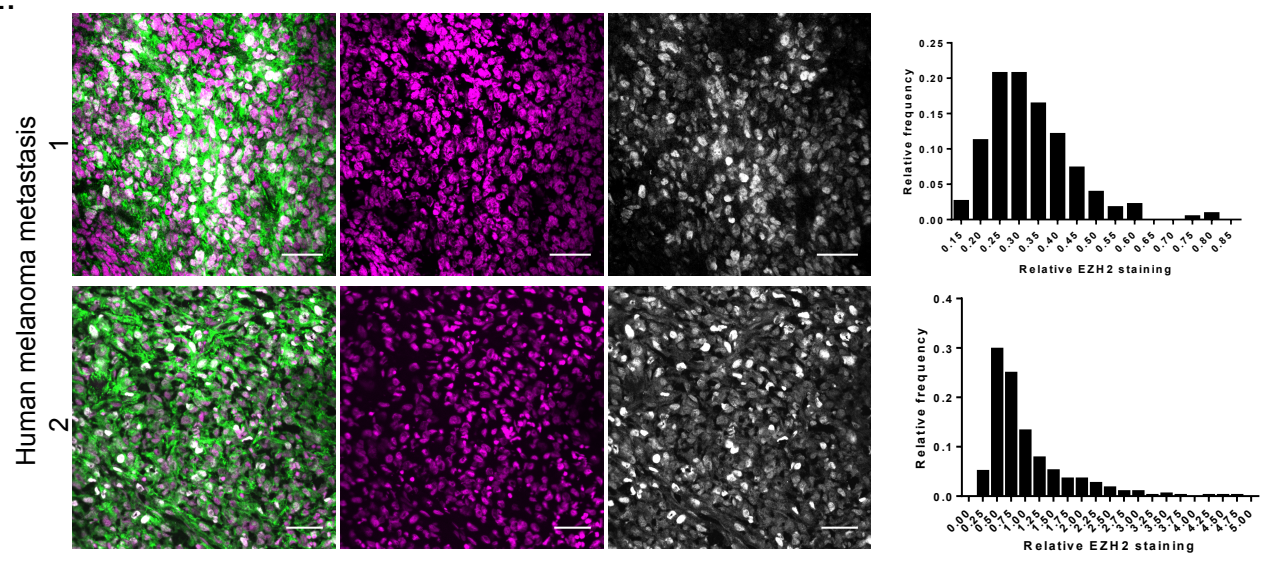

Supplement: NIHMS59788-supplement-Supp_Fig_4.pdf [file NIHMS59788-supplement-Supp_Fig_4.pdf]

# Supplementary Figure 5.

A

i

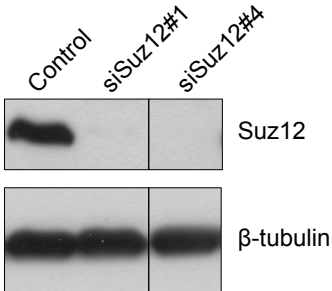

ii

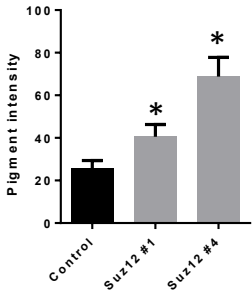

B

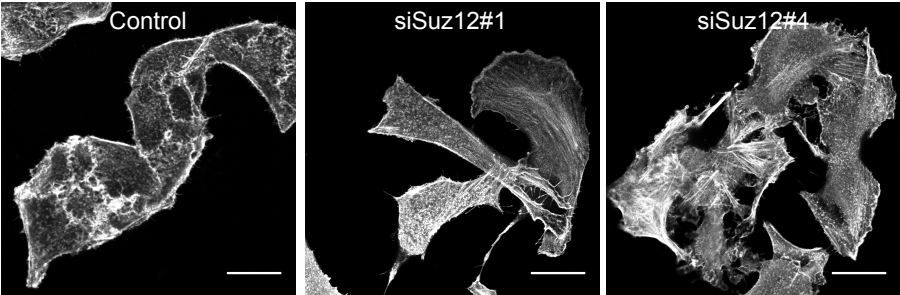

Supplement: NIHMS59788-supplement-Supp_Fig_5.pdf [file NIHMS59788-supplement-Supp_Fig_5.pdf]

# Supplementary Figure 6.

A.

|         | EZH2si#1 | EZH2si#4 | mock | non-targeting |
|---------|----------|----------|------|---------------|
| Dct     | 1.02     | 1.03     | 1.03 | 0.97          |
| Oca2    | 2.01     | 1.75     | 1.16 | 0.84          |
| Slc45a2 | 0.97     | 0.97     | 1.04 | 0.96          |
| Tyr     | 1.07     | 1.12     | 1.00 | 0.99          |
| Tyrp1   | 0.96     | 0.88     | 0.97 | 1.03          |

B.

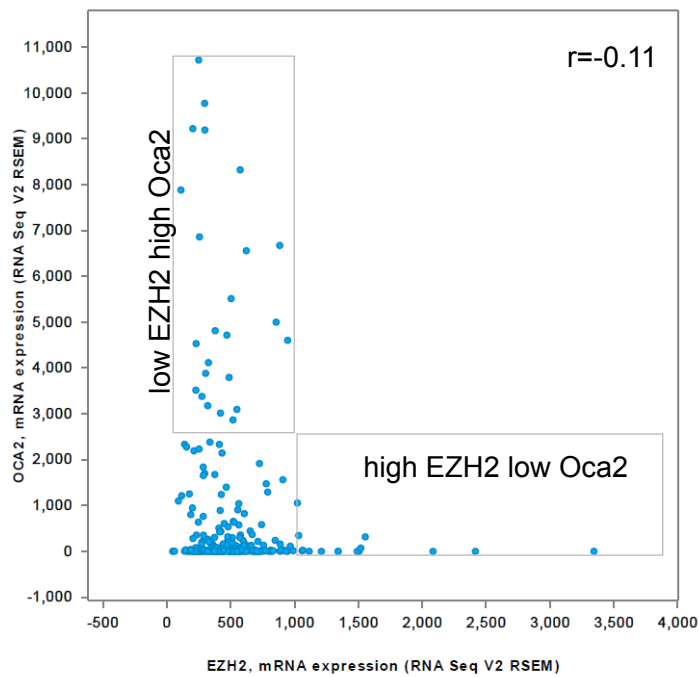

C.

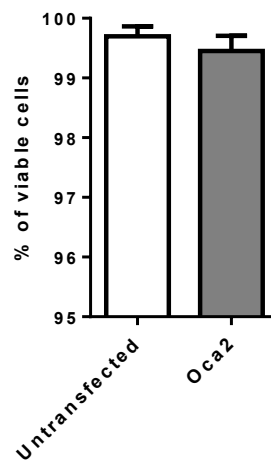

Supplement: NIHMS59788-supplement-Supp_Fig_6.pdf [file NIHMS59788-supplement-Supp_Fig_6.pdf]

# Supplementary Figure 7.

A.

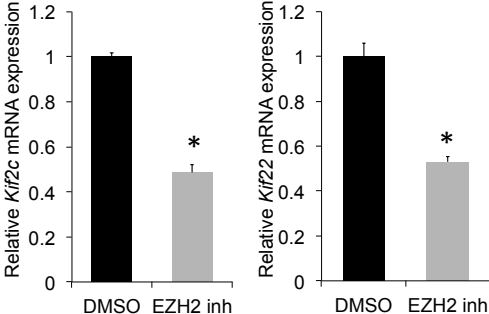

B.

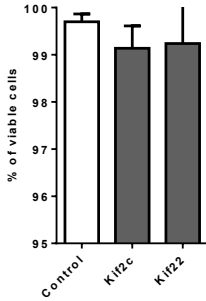

Supplement: NIHMS59788-supplement-Supp_Fig_7.pdf [file NIHMS59788-supplement-Supp_Fig_7.pdf]

# Supplementary Figure 8.

A.

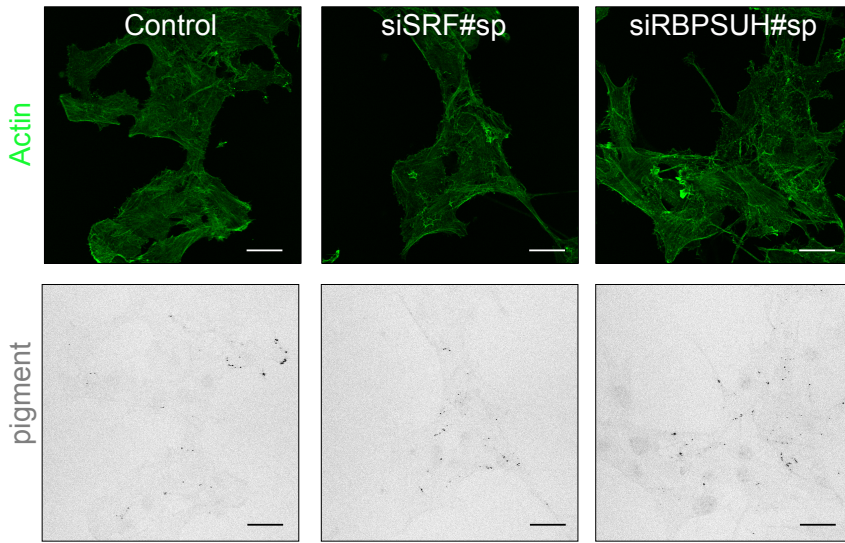

B.

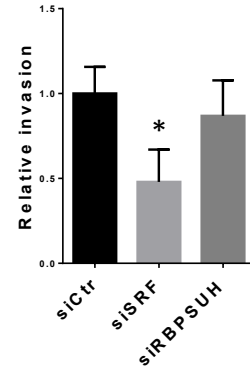

C.

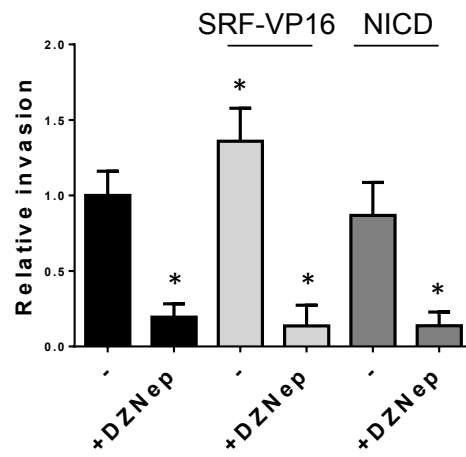

Supplement: NIHMS59788-supplement-Supp_Fig_8.pdf [file NIHMS59788-supplement-Supp_Fig_8.pdf]
